# Supplementary material for: Insights into genome recoding from the mechanism of a classic +1-frameshifting tRNA
Source: PubMed Central journal article supplement (PMC7803779; doi:10.1038/s41467-020-20373-z), 2021-01-12
Supplement: 41467_2020_20373_MOESM1_ESM.pdf [file 41467_2020_20373_MOESM1_ESM.pdf]

1 **Supplementary Information**

2  
3 **Insights into Genome Recoding**

4 **from the Mechanism of a Classic +1-Frameshifting tRNA**

5  
6  
7 **Howard Gamper<sup>1,5</sup>, Haixing Li<sup>2,5</sup>, Isao Masuda<sup>1</sup>, D. Miklos Robkis<sup>3</sup>, Thomas Christian<sup>1</sup>,**  
8 **Adam B. Conn<sup>4</sup>, Gregor Blaha<sup>4</sup>, E. James Petersson<sup>3</sup>, Ruben L. Gonzalez, Jr<sup>2,6</sup>,**  
9 **and Ya-Ming Hou<sup>1,6</sup>**

10  
11  
12  
13 **<sup>1</sup>Department of Biochemistry and Molecular Biology, Thomas Jefferson University,**  
14 **Philadelphia, PA 19107, USA**

15 **<sup>2</sup>Department of Chemistry, Columbia University, New York, NY 10027, USA**

16 **<sup>3</sup>Department of Chemistry, University of Pennsylvania, Philadelphia, PA 19104, USA**

17 **<sup>4</sup>Department of Biochemistry, University of California, Riverside, CA 92521, USA**

18 **<sup>5</sup>These authors contributed equally to this work.**

19 **<sup>6</sup>Corresponding authors:**

20 **[rlg2118@columbia.edu](mailto:rlg2118@columbia.edu) (T) 212-854-1096; (F) 212-932-1289**

21 **[ya-ming.hou@jefferson.edu](mailto:ya-ming.hou@jefferson.edu) (T) 215-503-4480; (F) 215-503-4954**

22  
23 **Running Title: Mechanism of *SufB2*-induced +1 frameshifting**

24



28 **Supplementary Table 2.** Kinetics of dipeptide and tripeptide formation upon delivery of *SufB2*-  
29 TC or *ProL*-TC to the A site of 70S ICs.

30

| <b>Conversion of fM to fMP (<math>k_{fMP,obs}</math>, s<sup>-1</sup>)</b> |                  |                               |                     |
|---------------------------------------------------------------------------|------------------|-------------------------------|---------------------|
| <b>TC</b>                                                                 | <b>G37-state</b> | <b>m<sup>1</sup>G37-state</b> | <b>Native-state</b> |
| <i>SufB2</i>                                                              | 0.91 ± 0.09      | 0.34 ± 0.03                   | 0.49 ± 0.03         |
| <i>ProL</i>                                                               | 0.83 ± 0.06      | 1.2 ± 0.1                     | 1.0 ± 0.1           |

  

| <b>Conversion of fMP to fMPV (<math>k_{fMP+V,obs}</math>, s<sup>-1</sup>)</b> |                  |                               |                     |
|-------------------------------------------------------------------------------|------------------|-------------------------------|---------------------|
| <b>TC</b>                                                                     | <b>G37-state</b> | <b>m<sup>1</sup>G37-state</b> | <b>Native-state</b> |
| <i>SufB2</i>                                                                  | 1.0 ± 0.1        | 1.7 ± 0.3                     | 2.0 ± 0.4           |
| <i>ProL</i>                                                                   | 6.0 ± 0.7        | 2.4 ± 0.3                     | 2.3 ± 0.2           |

  

| <b>Conversion of fMP to fMPR (<math>k_{fMP+R,obs}</math>, s<sup>-1</sup>)</b> |                  |                               |                     |
|-------------------------------------------------------------------------------|------------------|-------------------------------|---------------------|
| <b>TC</b>                                                                     | <b>G37-state</b> | <b>m<sup>1</sup>G37-state</b> | <b>Native-state</b> |
| <i>SufB2</i>                                                                  | 0.6 ± 0.2        | 0.36 ± 0.03                   | 0.14 ± 0.01         |
| <i>ProL</i>                                                                   | 1.4 ± 0.1        | 0.9 ± 0.1                     | 1.8 ± 0.1           |

31

32 **Supplementary Table 3.** Rates and yields of di- and tripeptide formation reactions performed  
33 with G37-state *SufB2* in the absence and presence of EF-P.

34

| Reaction                  | $k_{\text{obs}}$ ( $\text{s}^{-1}$ ) |                       | Di- or Tripeptide Yield (%) |                       |
|---------------------------|--------------------------------------|-----------------------|-----------------------------|-----------------------|
|                           | 0 $\mu\text{M}$ EF-P                 | 10 $\mu\text{M}$ EF-P | 0 $\mu\text{M}$ EF-P        | 10 $\mu\text{M}$ EF-P |
| Conversion of fM to fMP   | $0.91 \pm 0.09$                      | $1.2 \pm 0.1$         | 50                          | 50                    |
| Conversion of fM to fMPV  | $0.06 \pm 0.01$                      | $0.11 \pm 0.01$       | 58                          | 53                    |
| Conversion of fM to fMPR  | $0.04 \pm 0.01$                      | $0.07 \pm 0.01$       | 8.2                         | 4.9                   |
| Conversion of fMP to fMPV | $1.0 \pm 0.1$                        | $1.00 \pm 0.07$       | 53                          | 53                    |
| Conversion of fMP to fMPR | $0.6 \pm 0.1$                        | $0.6 \pm 0.1$         | 8.8                         | 8.7                   |

35

36

37

38

39 **Supplementary Table 4.** Rate constants characterizing the initial 70S IC→GS2 transition and  
 40 rate constants and equilibrium constants characterizing the subsequent GS1⇌GS2 equilibrium  
 41 that are observed upon delivery of *SufB2*- or *ProL*-TC to the A site of 70S ICs in the absence of  
 42 EF-G.

43

| <b>Pre-steady-state movie<sup>a</sup></b> |                                                                  |                                                              |                                                              |                            |
|-------------------------------------------|------------------------------------------------------------------|--------------------------------------------------------------|--------------------------------------------------------------|----------------------------|
| <b>Components</b>                         | <b><math>k_{70S\ IC \rightarrow GS2}</math> (s<sup>-1</sup>)</b> | <b><math>k_{GS1 \rightarrow GS2}</math> (s<sup>-1</sup>)</b> | <b><math>k_{GS2 \rightarrow GS1}</math> (s<sup>-1</sup>)</b> | <b><math>K_{eq}</math></b> |
| <i>SufB2</i> -TC                          | 0.30 ± 0.04                                                      | 0.58 ± 0.02                                                  | 0.32 ± 0.01                                                  | 1.81 ± 0.08                |
| <i>ProL</i> -TC                           | 0.6 ± 0.2                                                        | 0.82 ± 0.04                                                  | 0.45 ± 0.02                                                  | 1.82 ± 0.12                |

  

| <b>Steady-state movie at 1 min post-delivery<sup>a</sup></b> |                                                                  |                                                              |                                                              |                            |
|--------------------------------------------------------------|------------------------------------------------------------------|--------------------------------------------------------------|--------------------------------------------------------------|----------------------------|
| <b>Components</b>                                            | <b><math>k_{70S\ IC \rightarrow GS2}</math> (s<sup>-1</sup>)</b> | <b><math>k_{GS1 \rightarrow GS2}</math> (s<sup>-1</sup>)</b> | <b><math>k_{GS2 \rightarrow GS1}</math> (s<sup>-1</sup>)</b> | <b><math>K_{eq}</math></b> |
| <i>SufB2</i> -TC                                             | N.A. <sup>b</sup>                                                | 0.232 ± 0.006                                                | 0.236 ± 0.006                                                | 0.98 ± 0.04                |
| <i>ProL</i> -TC                                              | N.A.                                                             | 0.333 ± 0.009                                                | 0.32 ± 0.01                                                  | 0.96 ± 0.04                |

44 <sup>a</sup> The small differences between the rate constants and equilibrium constants obtained from the analysis  
 45 of the pre-steady-state movie and those obtained from the analysis of the steady-state movie most likely  
 46 arise from the fact that the pre-steady-state movies capture PRE complexes that have not yet reached  
 47 full conformational equilibrium. For this reason, the rate constants and equilibrium constants obtained  
 48 from the analyses of the steady-state movies are the ones that are reported in the text of the article.

49 <sup>b</sup> N.A. refers to values that are not applicable.

50 **Supplementary Table 5.** Rate constants characterizing the initial 70S IC→GS2 transition and  
 51 rate constants and fractional populations characterizing the GS2→POST transition that are  
 52 observed upon delivery of *SufB2*- or *ProL*-TC to the A site of 70S ICs in the presence of EF-G.

53

| <b><i>Pre-steady-state movie</i></b>                     |                                                          |                                                         |                 |
|----------------------------------------------------------|----------------------------------------------------------|---------------------------------------------------------|-----------------|
| <b>Components</b>                                        | <b><math>k_{70S\ IC \rightarrow GS2} (s^{-1})</math></b> | <b><math>k_{GS2 \rightarrow POST} (s^{-1})^a</math></b> | <b>POST (%)</b> |
| <i>SufB2</i> -TC + EF-G                                  | 0.33 ± 0.05                                              | N.A.                                                    | 20.4 ± 0.2      |
| <i>ProL</i> -TC + EF-G                                   | 0.31 ± 0.05                                              | 0.35 ± 0.02                                             | 42.8 ± 0.3      |
| <b><i>Steady-state movie at 1 min post-delivery</i></b>  |                                                          |                                                         |                 |
| <b>Components</b>                                        | <b><math>k_{70S\ IC \rightarrow GS2} (s^{-1})</math></b> | <b><math>k_{GS2 \rightarrow POST} (s^{-1})^a</math></b> | <b>POST (%)</b> |
| <i>SufB2</i> -TC + EF-G                                  | N.A.                                                     | N.A.                                                    | 35.5 ± 0.1      |
| <i>ProL</i> -TC + EF-G                                   | N.A.                                                     | N.A.                                                    | 72.6 ± 0.1      |
| <b><i>Steady-state movie at 3 min post-delivery</i></b>  |                                                          |                                                         |                 |
| <b>Components</b>                                        | <b><math>k_{70S\ IC \rightarrow GS2} (s^{-1})</math></b> | <b><math>k_{GS2 \rightarrow POST} (s^{-1})^a</math></b> | <b>POST (%)</b> |
| <i>SufB2</i> -TC + EF-G                                  | N.A.                                                     | N.A.                                                    | 34.6 ± 0.1      |
| <b><i>Steady-state movie at 10 min post-delivery</i></b> |                                                          |                                                         |                 |
| <b>Components</b>                                        | <b><math>k_{70S\ IC \rightarrow GS2} (s^{-1})</math></b> | <b><math>k_{GS2 \rightarrow POST} (s^{-1})^a</math></b> | <b>POST (%)</b> |
| <i>SufB2</i> -TC + EF-G                                  | N.A.                                                     | N.A.                                                    | 56.2 ± 0.1      |
| <b><i>Steady-state movie at 20 min post-delivery</i></b> |                                                          |                                                         |                 |
| <b>Components</b>                                        | <b><math>k_{70S\ IC \rightarrow GS2} (s^{-1})</math></b> | <b><math>k_{GS2 \rightarrow POST} (s^{-1})^a</math></b> | <b>POST (%)</b> |
| <i>SufB2</i> -TC + EF-G                                  | N.A.                                                     | N.A.                                                    | 63.4 ± 0.1      |

54 <sup>a</sup> N.A. refers to values that were not applicable.

55

56 **Supplementary Table 6.** Rate constants and equilibrium constants characterizing the GS1 $\rightleftharpoons$ GS2  
 57 equilibrium that is observed in a sub-population of PRE complexes that lack an A site-bound,  
 58 deacylated *SufB2* at the longer time points (i.e., 3, 10, and 20 min) post-delivery of *SufB2*-TC to  
 59 the A site of 70S ICs in the presence of EF-G.

60

| <b><i>Steady-state movie at 3 min post-delivery</i></b>  |                                                              |                                                              |                            |
|----------------------------------------------------------|--------------------------------------------------------------|--------------------------------------------------------------|----------------------------|
| <b>Components</b>                                        | <b><math>k_{GS1 \rightarrow GS2}</math> (s<sup>-1</sup>)</b> | <b><math>k_{GS2 \rightarrow GS1}</math> (s<sup>-1</sup>)</b> | <b><math>K_{eq}</math></b> |
| <i>SufB2</i> -TC + EF-G                                  | 0.260 ± 0.006                                                | 0.130 ± 0.003                                                | 2.00 ± 0.07                |
| <b><i>Steady-state movie at 10 min post-delivery</i></b> |                                                              |                                                              |                            |
| <b>Components</b>                                        | <b><math>k_{GS1 \rightarrow GS2}</math> (s<sup>-1</sup>)</b> | <b><math>k_{GS2 \rightarrow GS1}</math> (s<sup>-1</sup>)</b> | <b><math>K_{eq}</math></b> |
| <i>SufB2</i> -TC + EF-G                                  | 0.208 ± 0.004                                                | 0.245 ± 0.005                                                | 0.85 ± 0.02                |
| <b><i>Steady-state movie at 20 min post-delivery</i></b> |                                                              |                                                              |                            |
| <b>Components</b>                                        | <b><math>k_{GS1 \rightarrow GS2}</math> (s<sup>-1</sup>)</b> | <b><math>k_{GS2 \rightarrow GS1}</math> (s<sup>-1</sup>)</b> | <b><math>K_{eq}</math></b> |
| <i>SufB2</i> -TC + EF-G                                  | 0.180 ± 0.003                                                | 0.301 ± 0.006                                                | 0.60 ± 0.02                |

61

62 **Supplementary Table 7.** Rate constants and equilibrium constants characterizing the GS1 $\rightleftharpoons$ GS2  
63 equilibrium of the *SufB2*- and *ProL*-PRE<sup>-A</sup> complexes.

64

---

***Steady-state movie***

| <b>PRE<sup>-A</sup> Complex</b> | <b><math>k_{GS1 \rightarrow GS2}</math> (s<sup>-1</sup>)<sup>a</sup></b> | <b><math>k_{GS2 \rightarrow GS1}</math> (s<sup>-1</sup>)<sup>a</sup></b> | <b><math>K_{eq}</math><sup>a</sup></b> |
|---------------------------------|--------------------------------------------------------------------------|--------------------------------------------------------------------------|----------------------------------------|
| <i>SufB2</i>                    | 0.227 ± 0.002                                                            | 0.363 ± 0.003                                                            | 0.625 ± 0.008                          |
| <i>ProL</i>                     | 0.412 ± 0.003                                                            | 0.267 ± 0.002                                                            | 1.54 ± 0.02                            |

---

65

66



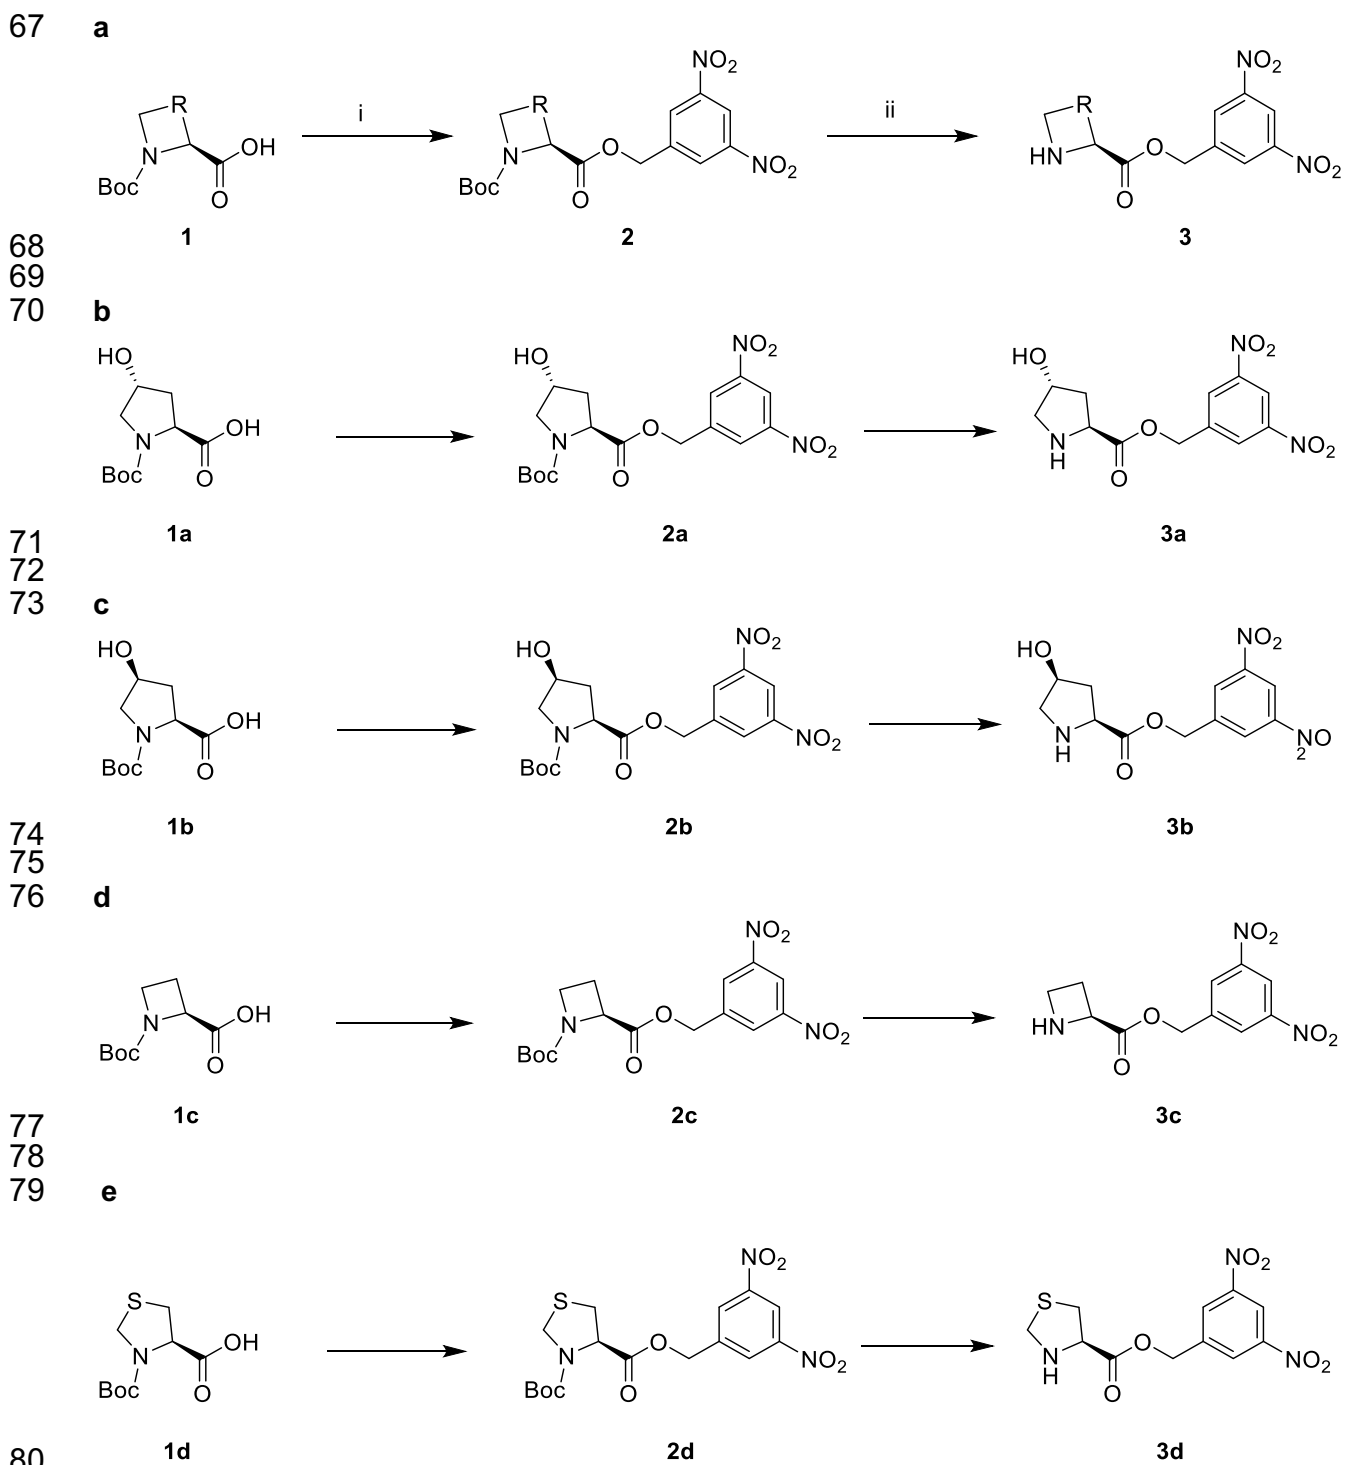

81 **Supplementary Figure 1. a** Syntheses of proline dinitrobenzyl ester analogs. The generalized  
 82 synthesis scheme that was used for generating the proline dinitrobenzyl ester analogs. Step *i* was  
 83 performed in 3,5-dinitrobenzyl chloride, sodium iodide (NaI), N,N-diisopropylethylamine

84 (DIPEA), and tetrahydrofuran (THF) and step *ii* was performed in trifluoroacetic acid (TFA) and  
85 trichloromethane (CHCl<sub>3</sub>). All chemicals were purchased from Sigma-Aldrich (St. Louis, MO) or  
86 Fisher Scientific (Waltham, MA). Boc-protected proline derivatives were purchased from  
87 ChemImpex (Wood Dale, IL). All reagents were used without further purification. Preparative high-  
88 performance LC (HPLC) was performed on a Varian Prostar HPLC system (Agilent Technologies,  
89 Santa Clara, CA) using a gradient elution from 0:100 acetonitrile:water with 0.1% TFA to 45:55  
90 acetonitrile:water with 0.1% TFA. A Waters Sunfire C18 OBD Prep column was used to purify all  
91 final products. **b** Synthesis of trans-L-4-hydroxyproline dinitrobenzyl ester (3a). Boc-trans-L-4-  
92 hydroxyproline (1a) (231 mg, 1.00 mmol), 3,5-dinitrobenzoyl chloride (543 mg, 2.5 mmol), and  
93 NaI (450 mg, 3.00 mmol) were dissolved in THF (10 mL). DIPEA (695  $\mu$ L, 4.00 mmol) was added  
94 and the reaction was stirred at room temperature overnight. The next day, the crude reaction  
95 mixture was partitioned between 100 mL water (H<sub>2</sub>O)/ethyl acetate (EtOAc) (1:1). The organic  
96 phase was washed twice with a saturated ammonium chloride (NH<sub>4</sub>Cl) solution and once with  
97 brine before being dried over magnesium sulfate (MgSO<sub>4</sub>). The solution was then filtered and the  
98 solvent was removed *in vacuo*. Crude product was dissolved in dichloromethane (CH<sub>2</sub>Cl<sub>2</sub>) and  
99 purified over silica using 5% methanol (MeOH) in CH<sub>2</sub>Cl<sub>2</sub> (R<sub>f</sub> = 0.3). Pure fractions were combined  
100 and the solvent was removed *in vacuo*. Purified Boc-trans-L-4-hydroxyproline dinitrobenzyl ester  
101 (2a) was produced in 46.0% yield as an orange foam. 2a (95 mg, 0.23 mmol) was dissolved in  
102 CHCl<sub>3</sub> (1mL), and TFA (1mL) was added while stirring. After 1 hour stirring at room temperature,  
103 the solvent was removed *in vacuo*. The crude product was dissolved in 50% acetonitrile (MeCN)  
104 in H<sub>2</sub>O and purified by reverse phase HPLC. The desired product, 3a, eluted with approximately  
105 24% MeCN and was isolated in high purity. After lyophilization, 3a was dissolved in dimethyl  
106 sulfoxide (DMSO) to yield a 25 mM stock solution used in later experiments. **c** Synthesis of trans-  
107 L-4-hydroxyproline dinitrobenzyl ester (3b). Boc-cis-L-4-hydroxyproline (1b) (231 mg, 1.00 mmol),  
108 3,5-dinitrobenzoyl chloride (543 mg, 2.5 mmol), and NaI (450 mg, 3.00 mmol) were dissolved in  
109 THF (10 mL). DIPEA (695  $\mu$ L, 4.00 mmol) was added and the reaction was stirred at room

110 temperature overnight. The next day, the crude reaction mixture was partitioned between 100 mL  
111 H<sub>2</sub>O/EtOAc (1:1). The organic phase was washed twice with a saturated NH<sub>4</sub>Cl solution and once  
112 with brine before being dried over MgSO<sub>4</sub>. The solution was then filtered and the solvent was  
113 removed *in vacuo*. Crude product was dissolved in CH<sub>2</sub>Cl<sub>2</sub> and purified over silica using 5% MeOH  
114 in CH<sub>2</sub>Cl<sub>2</sub> (R<sub>f</sub> = 0.3). Pure fractions were combined and the solvent was removed *in vacuo*. Purified  
115 Boc-cis-L-4-hydroxyproline dinitrobenzyl ester (2b) was produced in 30.4% yield as an orange  
116 foam. 2b (62 mg, 0.15 mmol) was dissolved in CHCl<sub>3</sub> (1mL), and TFA (1mL) was added while  
117 stirring. After 1 hour stirring at room temperature, the solvent was removed *in vacuo*. The crude  
118 product was dissolved in 50% MeCN in H<sub>2</sub>O and purified by reverse phase HPLC. The desired  
119 product, 3b, eluted with approximately 26% MeCN and was isolated in high purity. After  
120 lyophilization, 3b was dissolved in DMSO to yield a 25 mM stock solution used in later  
121 experiments. **d** Synthesis of 2-carboxyazetidine dinitrobenzyl ester (3c). Boc-L-azetidine-2-  
122 carboxylic acid (1c) (201 mg, 1.00 mmol), 3,5-dinitrobenzoyl chloride (543 mg, 2.5 mmol), and  
123 NaI (450 mg, 3.00 mmol) were dissolved in THF (10 mL). DIPEA (695 μL, 4.00 mmol) was added  
124 and the reaction was stirred at room temperature overnight. The next day, the crude reaction  
125 mixture was partitioned between 100 mL H<sub>2</sub>O/EtOAc (1:1). The organic phase was washed twice  
126 with a saturated NH<sub>4</sub>Cl solution and once with brine before being dried over MgSO<sub>4</sub>. The solution  
127 was then filtered and the solvent was removed *in vacuo*. Crude product was dissolved in CH<sub>2</sub>Cl<sub>2</sub>  
128 and purified over silica using 2% MeOH in CH<sub>2</sub>Cl<sub>2</sub> (R<sub>f</sub> = 0.3). Pure fractions were combined and  
129 the solvent was removed *in vacuo*. Purified Boc-L-azetidine-2-carboxylic acid dinitrobenzyl ester,  
130 2c, was produced in 70.3% yield as a red oil. 2c (134 mg, 0.35 mmol) was dissolved in CHCl<sub>3</sub>  
131 (1mL), and TFA (1mL) was added while stirring. After 1 hour stirring at room temperature, the  
132 solvent was removed *in vacuo*. The crude product was dissolved in 50% MeCN in H<sub>2</sub>O and  
133 purified by reverse phase HPLC. The desired product, 3c, eluted with approximately 27% MeCN  
134 and was isolated in high purity. After lyophilization, 3c was dissolved in DMSO to yield a 25 mM  
135 stock solution used in later experiments. **e** Synthesis of thiaproline dinitrobenzyl ester (3d). Boc-

136 L-thiaproline (1d) (116 mg, 0.50 mmol) and 3,5-dinitrobenzoyl chloride (217 mg, 1.0 mmol) were  
137 dissolved in THF (5 mL). DIPEA (348  $\mu$ L, 2.00 mmol) was added and the reaction was stirred at  
138 room temperature overnight. The next day, the crude reaction mixture was partitioned between  
139 100 mL H<sub>2</sub>O/EtOAc (1:1). The organic phase was washed twice with a saturated NH<sub>4</sub>Cl solution  
140 and once with brine before being dried over MgSO<sub>4</sub>. The solution was then filtered and the solvent  
141 was removed *in vacuo*. Crude product was dissolved in CH<sub>2</sub>Cl<sub>2</sub> and purified over silica using 1%  
142 MeOH in CH<sub>2</sub>Cl<sub>2</sub> (R<sub>f</sub> = 0.4). Pure fractions were combined and the solvent was removed *in vacuo*.  
143 Purified Boc-L-thiaproline dinitrobenzyl ester (2d) was produced in 77.5% yield as a yellow oil. 2d  
144 (160 mg, 0.39 mmol) was dissolved in CHCl<sub>3</sub> (1mL), and TFA (1mL) was added while stirring.  
145 After 1 hour stirring at room temperature, the solvent was removed *in vacuo*. The crude product  
146 was dissolved in 50% MeCN in H<sub>2</sub>O and purified by reverse phase HPLC. The desired product,  
147 3d, eluted with approximately 30% MeCN and was isolated in high purity. After lyophilization, 3d  
148 was dissolved in DMSO to yield a 25 mM stock solution used in later experiments.

149

150 **Nuclear magnetic resonance (NMR) and electrospray ionization mass spectrometry (ESI-**  
151 **MS) characterization of proline dinitrobenzyl ester analogs**

152 NMR spectra were obtained on a Bruker DRX 500 MHz instrument (Billerica, MA). Electrospray  
153 ionization high-resolution mass spectrometry (ESI-HRMS) spectra were collected with a Waters  
154 LCT Premier XE liquid chromatograph-mass spectrometer (LC-MS) (Milford, MA). Electrospray  
155 ionization low-resolution mass spectrometry (ESI-LRMS) spectra were obtained on a Waters  
156 Acquity Ultra Performance LC connected to a single-quadrupole-detector (SQD) MS.

157

158 **2a:** <sup>1</sup>H NMR (500 MHz, CDCl<sub>3</sub>-d)  $\delta$  8.93 (dt, J = 18.1, 2.1 Hz, 1H), 8.54 (dd, J = 14.5, 2.1 Hz, 2H),  
159 5.39 – 5.24 (m, 2H), 4.51 – 4.42 (m, 2H), 3.56 (ddd, J = 15.8, 11.6, 4.2 Hz, 1H), 3.47 (ddt, J =  
160 34.5, 11.6, 1.8 Hz, 1H), 2.38 – 2.24 (m, 1H), 2.08 – 1.98 (m, 1H), 1.33 (d, J = 38.8 Hz, 9H). <sup>13</sup>C  
161 NMR (126 MHz, CDCl<sub>3</sub>)  $\delta$  172.65, 154.70, 153.97, 148.63, 140.43, 140.06, 127.89, 118.52, 80.72,

162 70.03, 69.12, 64.31, 57.76, 54.79, 39.09, 38.44, 28.24. ESI<sup>+</sup>-HRMS: Calculated for  
163 C<sub>17</sub>H<sub>21</sub>N<sub>3</sub>O<sub>9</sub>Na<sup>+</sup>: 434.1175; Found [M + Na]<sup>+</sup>: 434.1171.

164  
165 **2b**: <sup>1</sup>H NMR (500 MHz, CDCl<sub>3</sub>-d) δ 8.96 (dt, J = 10.0, 2.1 Hz, 1H), 8.59 (dd, J = 9.2, 2.1 Hz, 2H),  
166 5.43 (t, J = 13.4 Hz, 1H), 5.34 (dd, J = 13.7, 7.3 Hz, 1H), 4.52 – 4.44 (m, 1H), 4.44 – 4.39 (m, 1H),  
167 3.61 – 3.51 (m, 2H), 3.03 (s, 1H), 2.42 – 2.30 (m, 1H), 2.23 – 2.13 (m, 1H), 1.39 (d, J = 35.2 Hz,  
168 9H). <sup>13</sup>C NMR (126 MHz, CDCl<sub>3</sub>) δ 174.04, 154.62, 148.69, 140.36, 127.80, 118.46, 80.70, 71.05,  
169 69.90, 64.67, 57.78, 55.73, 38.04, 28.36. ESI<sup>+</sup>-HRMS: Calculated for C<sub>17</sub>H<sub>21</sub>N<sub>3</sub>O<sub>9</sub>Na<sup>+</sup>: 434.1175;  
170 Found [M + Na]<sup>+</sup>: 434.1205.

171  
172 **2c**: <sup>1</sup>H NMR (500 MHz, CDCl<sub>3</sub>-d) δ 8.88 (s, 1H), 8.53 (d, J = 2.1 Hz, 2H), 5.36 (d, J = 2.8 Hz, 2H),  
173 4.67 (dd, J = 9.2, 5.4 Hz, 1H), 3.91 (dtd, J = 45.7, 8.4, 5.9 Hz, 2H), 2.59 – 2.41 (m, 1H), 2.25 –  
174 2.08 (m, 1H), 1.30 (s, 9H). <sup>13</sup>C NMR (126 MHz, CDCl<sub>3</sub>) δ 170.85, 148.43, 140.19, 127.78, 118.37,  
175 80.19, 64.21, 59.64, 48.03, 28.36, 20.11. ESI<sup>+</sup>-HRMS: Calculated for C<sub>16</sub>H<sub>21</sub>N<sub>3</sub>O<sub>8</sub>Na<sup>+</sup>: 404.1070;  
176 Found [M + Na]<sup>+</sup>: 404.1086

177  
178 **2d**: <sup>1</sup>H NMR (500 MHz, CDCl<sub>3</sub>-d) δ 8.92 (d, J = 6.6 Hz, 1H), 8.53 (d, J = 2.1 Hz, 2H), 5.47 – 5.28  
179 (m, 2H), 4.93 – 4.76 (m, 1H), 4.56 (dd, J = 22.7, 8.9 Hz, 1H), 4.42 (t, J = 8.0 Hz, 1H), 3.40 – 3.26  
180 (m, 1H), 3.22 – 3.13 (m, 1H), 1.37 (d, J = 36.1 Hz, 9H). <sup>13</sup>C NMR (126 MHz, CDCl<sub>3</sub>) δ 170.23,  
181 153.23, 148.61, 140.18, 127.60, 118.44, 81.48, 64.63, 61.65, 48.32, 33.31, 28.16. ESI<sup>+</sup>-HRMS:  
182 Calculated for C<sub>16</sub>H<sub>19</sub>N<sub>3</sub>O<sub>8</sub>SNa<sup>+</sup>: 436.0791; Found [M + Na]<sup>+</sup>: 436.0796 .

183  
184 **3a**: <sup>1</sup>H NMR (500 MHz, DMSO-*d*<sub>6</sub>) δ 9.75 (s, 2H), 8.82 (t, J = 2.1 Hz, 1H), 8.75 (d, J = 2.1 Hz, 2H),  
185 5.60 (s, 1H), 5.49 (s, 2H), 4.66 (dd, J = 10.7, 7.6 Hz, 1H), 4.48 – 4.44 (m, 1H), 3.38 (dd, J = 12.1,  
186 4.2 Hz, 1H), 3.13 (dt, J = 12.1, 1.6 Hz, 1H), 2.30 – 2.14 (m, 2H). <sup>13</sup>C NMR (126 MHz, DMSO-*d*<sub>6</sub>)

187  $\delta$  168.50, 148.09, 139.56, 128.56, 118.39, 68.48, 65.17, 57.62, 53.40, 36.93. ESI<sup>+</sup>-HRMS:  
188 Calculated for C<sub>12</sub>H<sub>14</sub>N<sub>3</sub>O<sub>7</sub><sup>+</sup>: 312.0832; Found [M + H]<sup>+</sup>: 312.0833.

189  
190 **3b**: <sup>1</sup>H NMR (500 MHz, DMSO-*d*<sub>6</sub>)  $\delta$  9.74 (s, 2H), 8.81 (t, *J* = 2.1 Hz, 1H), 8.74 (d, *J* = 2.1 Hz, 2H),  
191 5.51 (d, *J* = 2.1 Hz, 2H), 4.71 (dd, *J* = 9.7, 3.4 Hz, 1H), 4.40 (dt, *J* = 4.2, 2.1 Hz, 1H), 3.73 (s, 1H),  
192 3.28 (dd, *J* = 11.9, 4.0 Hz, 1H), 3.21 (dt, *J* = 11.5, 1.5 Hz, 1H), 2.36 (ddd, *J* = 13.8, 9.7, 4.3 Hz,  
193 1H), 2.24 (ddt, *J* = 13.4, 3.4, 1.8 Hz, 1H). <sup>13</sup>C NMR (126 MHz, DMSO-*d*<sub>6</sub>)  $\delta$  169.07, 148.07, 139.70,  
194 128.53, 118.33, 68.17, 65.20, 57.70, 53.28, 37.15. ESI<sup>+</sup>-HRMS: Calculated for C<sub>12</sub>H<sub>13</sub>N<sub>3</sub>O<sub>7</sub>Na<sup>+</sup>:  
195 334.0651; Found [M + Na]<sup>+</sup>: 334.0673.

196  
197 **3c**: <sup>1</sup>H NMR (500 MHz, DMSO-*d*<sub>6</sub>)  $\delta$  8.82 (t, *J* = 2.2 Hz, 1H), 8.75 (d, *J* = 2.1 Hz, 2H), 5.50 (s, 2H),  
198 5.28 (t, *J* = 9.0 Hz, 1H), 4.01 (dt, *J* = 10.0, 8.8 Hz, 1H), 3.81 (ddd, *J* = 10.0, 8.6, 7.1 Hz, 2H), 2.73  
199 – 2.64 (m, 2H). <sup>13</sup>C NMR (126 MHz, DMSO)  $\delta$  167.86, 148.10, 139.51, 128.73, 118.44, 65.12,  
200 56.54, 43.02, 22.49. ESI<sup>+</sup>-HRMS: Calculated for C<sub>11</sub>H<sub>12</sub>N<sub>3</sub>O<sub>6</sub><sup>+</sup>: 282.0726; Found [M + H]<sup>+</sup>:  
201 282.0728.

202  
203 **3d**: <sup>1</sup>H NMR (500 MHz, DMSO-*d*<sub>6</sub>)  $\delta$  8.80 (t, *J* = 2.1 Hz, 1H), 8.70 (d, *J* = 2.1 Hz, 2H), 5.43 (d, *J* =  
204 4.5 Hz, 2H), 4.31 (dd, *J* = 7.1, 5.7 Hz, 1H), 4.17 (q, *J* = 9.1 Hz, 2H), 3.13 (dd, *J* = 10.5, 7.1 Hz,  
205 1H), 3.03 (dd, *J* = 10.4, 5.7 Hz, 1H). <sup>13</sup>C NMR (126 MHz, DMSO)  $\delta$  170.32, 148.08, 140.22,  
206 128.18, 118.19, 64.36, 64.27, 53.30, 35.21. ESI<sup>+</sup>-HRMS: Calculated for C<sub>11</sub>H<sub>12</sub>N<sub>3</sub>O<sub>6</sub>S<sup>+</sup>: 314.0447;  
207 Found [M + H]<sup>+</sup>: 314.0443.

208

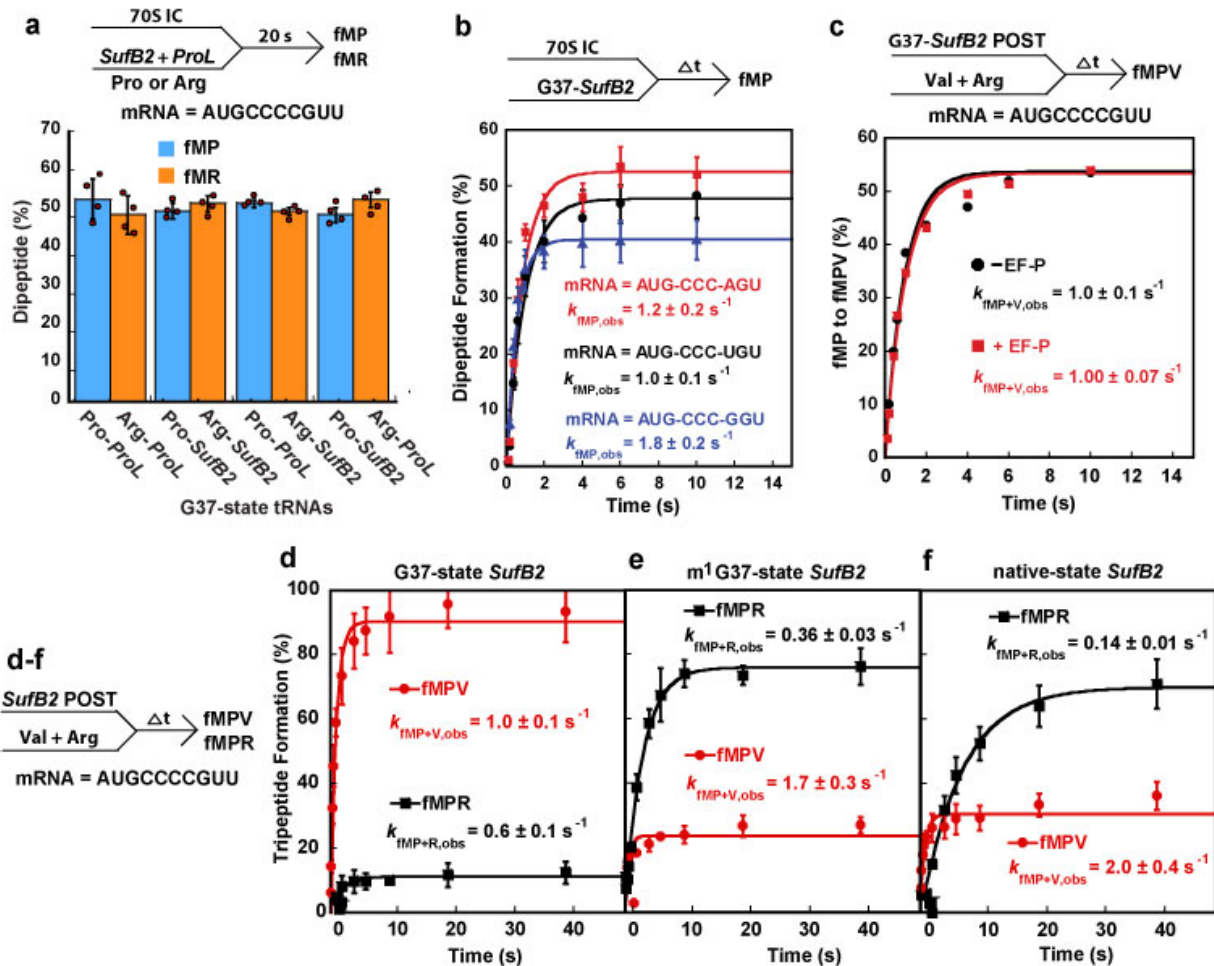

210

211 **Supplementary Figure 2. Dipeptide and tripeptide formation assays.**212 assays comparing the yields of G37-state *SufB2*- and *ProL*-TC. Each tRNA was pre-

213 aminoacylated with Pro or Arg, as indicated on the X axis of the bar graph, and used to form TCs.

214 Equimolar mixtures of the pairs of TCs indicated on the X axis of the bar graph

215 to the A site of a 70S IC. **b** Plot of fMP formation as a function of time for delivery of G37-state216 *SufB2*-TC to the A site of 70S ICs programmed with a CCC-N motif at the A site in which N = A,217 U, or G. **c** Relative fMPV and fMPR formation as a function of time upon rapid delivery of an218 equimolar mixture of tRNA<sup>Arg</sup>- and tRNA<sup>Val</sup>-TCs to POST complexes carrying G37-state fMP-219 *SufB2* at the P site in the absence or presence of 10 μM β-lysinylated EF-P. The mRNA coding220 sequence is AUG-CCC-CGU-U. **d-f** Relative fMPV and fMPR formation as a function of time upon

221 rapid delivery of an equimolar mixture of tRNA<sup>Arg</sup>- and tRNA<sup>Val</sup>-TCs to POST complexes carrying  
222 **d** G37-state-, **e** m<sup>1</sup>G37-state-, or **f** native-state fMP-*SufB2* at the P site. The mRNA coding  
223 sequence is AUG-CCC-CGU-U. These kinetic and yield plots correspond to the bar graphs in  
224 Figure 5c. In panel **a**, the bars are SD of four independent experiments (n = 4), whereas in panels  
225 **b-f**, the bars are SD of three independent experiments (n = 3). All data are presented as mean  
226 values ± SD. Δt: a time interval.



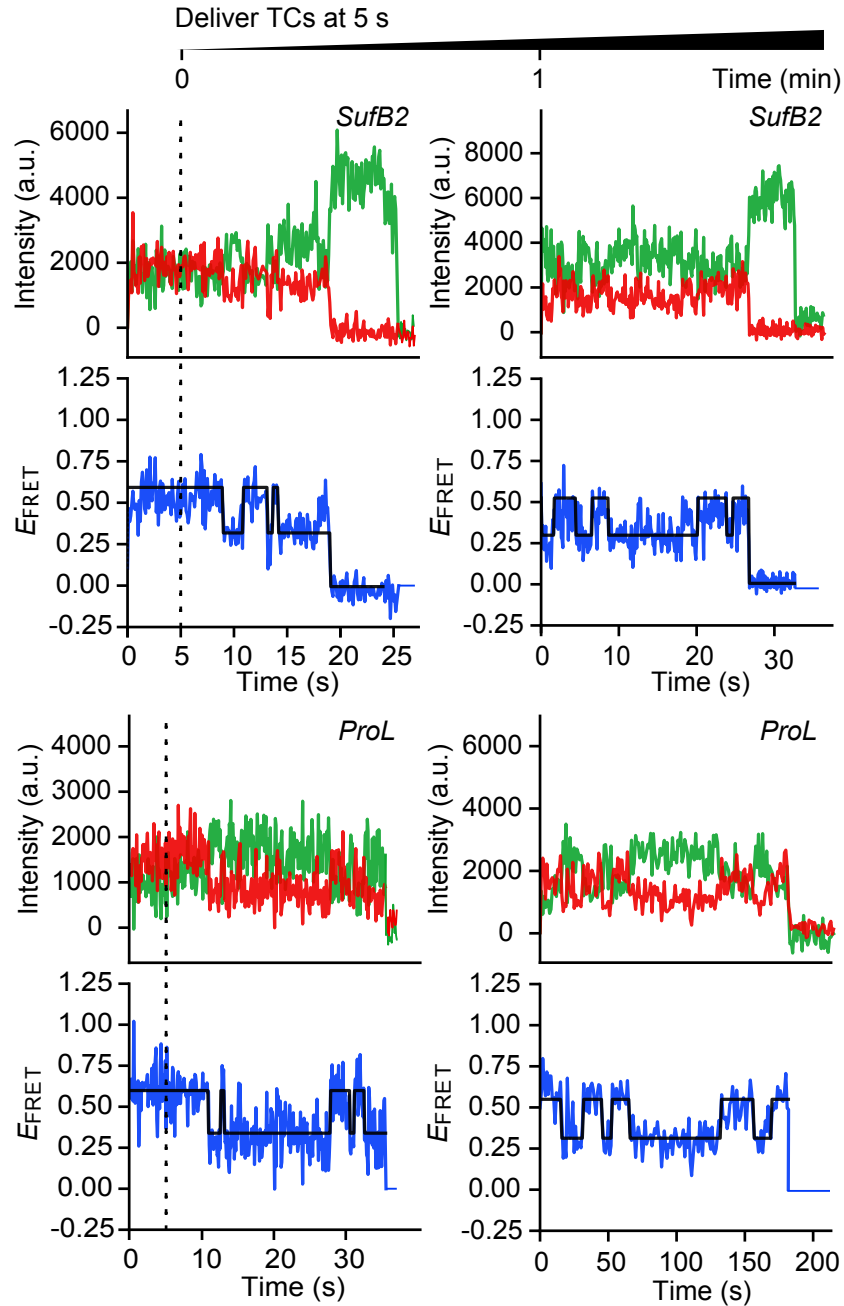

227  
228

229 **Supplementary Figure 3. Representative fluorescence intensity and  $E_{\text{FRET}}$  vs. time**

230 **trajectories recorded in the absence of EF-G.** Representative Cy3 (green) and Cy5 (red)

231 fluorescence intensity vs. time trajectories and corresponding  $E_{\text{FRET}}$  (blue) vs. time trajectories for

232 ribosomal complexes described in Figures 6a, 6d, and 6f. The Viterbi paths (black) are

233 superimposed on the  $E_{\text{FRET}}$  trajectories. The black vertical dashed lines in the leftmost plots

234 indicate the time at which the TCs were stopped-flow delivered.

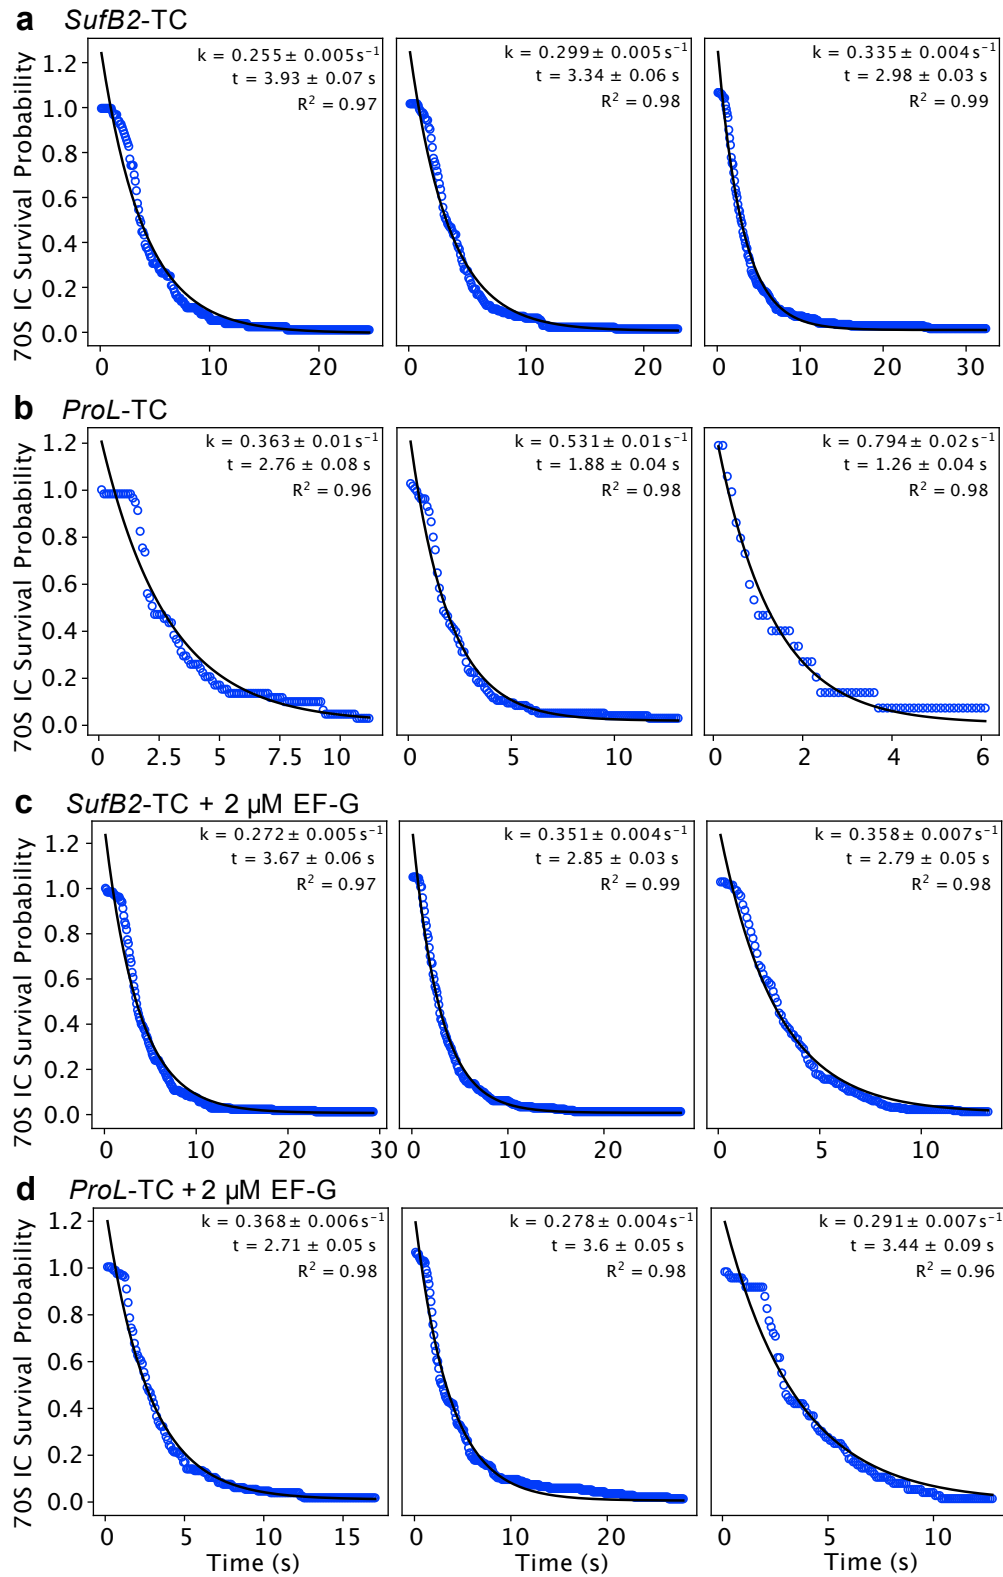

235  
236  
237

**Supplementary Figure 4. Plots of the 70S IC survival probability vs. time used to determine**

238  $k_{70S \text{ IC} \rightarrow \text{GS}2}$ . **a, c** SufB2-TC or **b, d** ProL-TC in the **a, b** absence or **c, d** presence of EF-G were

239 stopped-flow delivered to 70S ICs and the survival probability of the 70S IC prior to undergoing a  
240 transition to GS2 (blue circles) was plotted as a function of time. The resulting survival probability  
241 plots were well described by a single exponential decay (black solid line), which was used to  
242 determine  $k_{70S\ IC \rightarrow GS2}$ , as described in the *Analysis of smFRET experiments* section of the  
243 Methods. Three technical replicates of each experiment were performed and the survival  
244 probability plot of each replicate is shown. The mean value and standard deviation of the  $k_{70S}$   
245  $_{IC \rightarrow GS2}$  for each condition reported in Supplemental Tables 4 and 5 was determined from the  
246 analysis of the three technical replicates as described in the Analysis of smFRET experiments  
247 section of Methods.

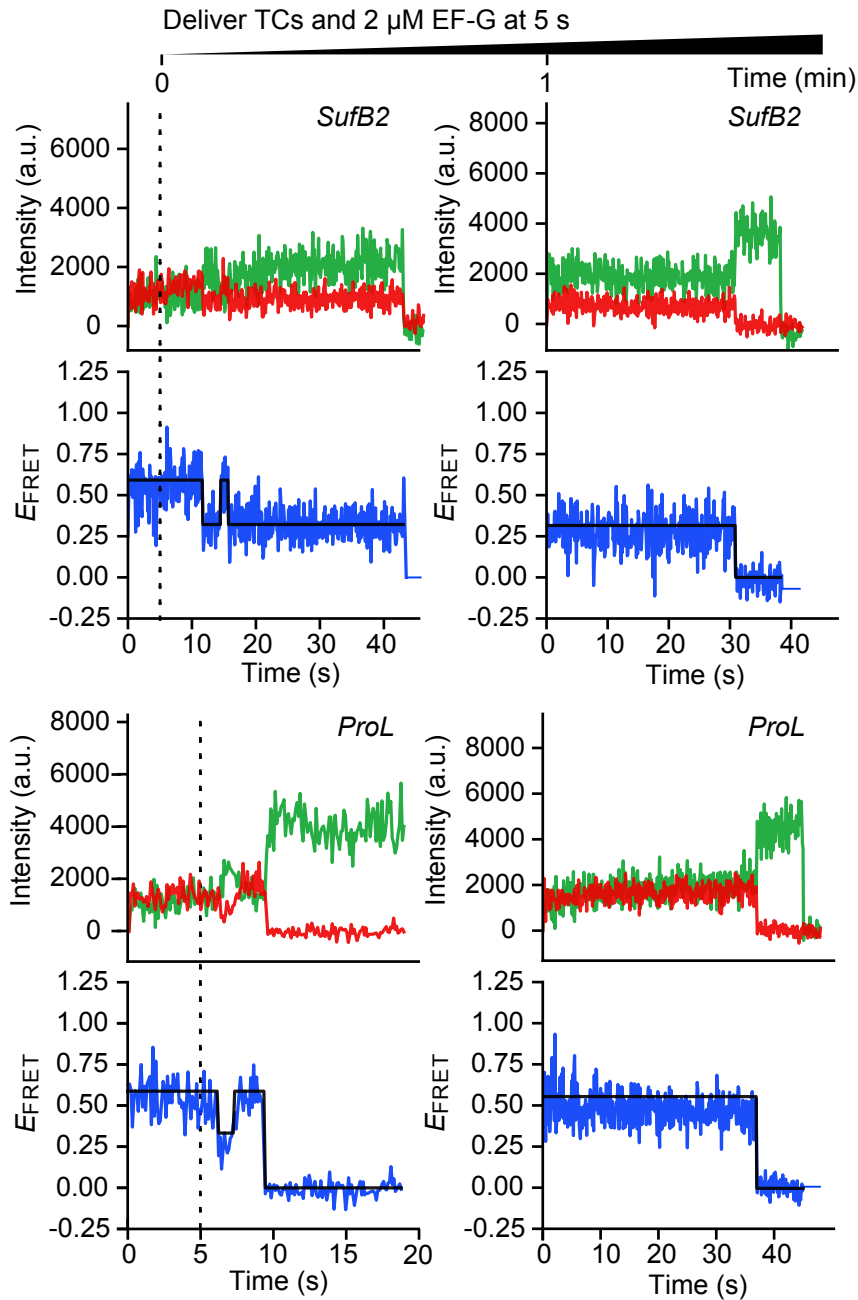

248  
249

250 **Supplementary Figure 5. Representative fluorescence intensity and  $E_{\text{FRET}}$  vs. time**  
 251 **trajectories recorded in the presence of EF-G.** Representative Cy3 (green) and Cy5 (red)  
 252 fluorescence intensity vs. time trajectories and corresponding  $E_{\text{FRET}}$  (blue) vs. time trajectories for  
 253 ribosomal complexes described in Figures 6b, 6e, and 6g. The Viterbi paths (black) are  
 254 superimposed on the  $E_{\text{FRET}}$  trajectories. The black vertical dashed lines in the leftmost plots  
 255 indicate the time at which the mixture of TC and EF-G was stopped-flow delivered.

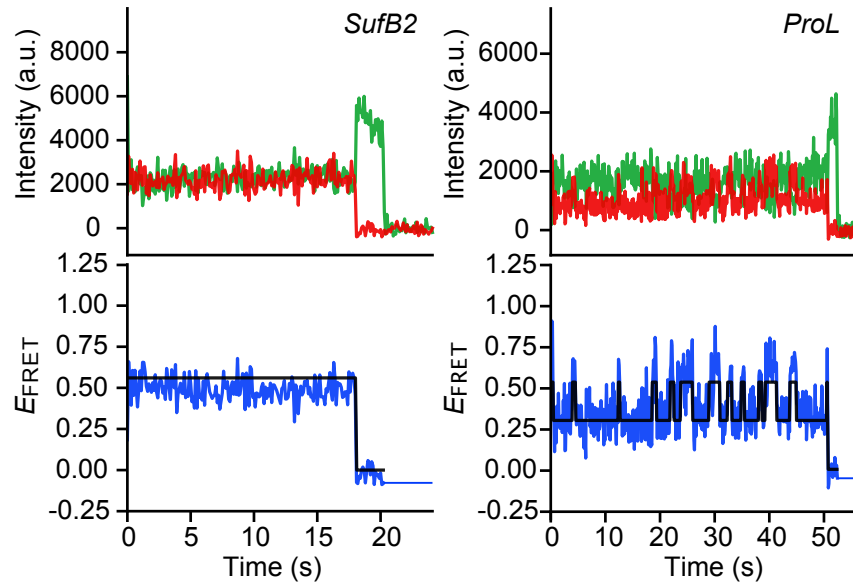

256  
257

258 **Supplementary Figure 6. Representative fluorescence intensity and  $E_{\text{FRET}}$  vs. time**  
 259 **trajectories recorded for PRE<sup>-A</sup> complexes.** Representative Cy3 (green) and Cy5 (red)  
 260 fluorescence intensity vs. time trajectories and corresponding  $E_{\text{FRET}}$  (blue) vs. time trajectories for  
 261 ribosomal complexes described in Figures 6c and 6h. The Viterbi paths (black) are superimposed  
 262 on the  $E_{\text{FRET}}$  trajectories.
